# Supplementary material for: The C-Type Lysozyme from the upper Gastrointestinal Tract of Opisthocomus hoatzin, the Stinkbird
Source: PubMed Central journal article supplement (PMC6887759; doi:10.3390/ijms20225531), 2019-11-06
Supplement: ijms-20-05531-s001.pdf [file ijms-20-05531-s001.pdf]

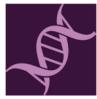

Article

# The C-Type Lysozyme from the upper Gastrointestinal Tract of *Opisthocomus hoatzin*, the Stinkbird

## Supplementary Material

**Supplementary Table S1.** Sequence identifiers for the avian GH22 proteins in Figure 5. The common names are coloured according to the subfamilies described in Figure 5.

| Common name (as shown in Figure 5) | Source organism scientific name (as shown in database) | Database reference   | Cluster size (> 1) |
|------------------------------------|--------------------------------------------------------|----------------------|--------------------|
| Adelie penguin                     | Pygoscelis adeliae                                     | SWISSPROT_A0A093NTL5 | 2                  |
| American crow                      | Corvus brachyrhynchos                                  | SWISSPROT_A0A091FMC9 |                    |
| Band-tailed pigeon                 | Patagioenas fasciata monilis                           | SWISSPROT_A0A1V4KD54 |                    |
| Bare-faced curassow                | Crax fasciolata                                        | SWISSPROT_Q7LZQ3     |                    |
| Barn owl                           | Tyto alba                                              | SWISSPROT_A0A093FKQ0 |                    |
| Blue-fronted parrot                | Amazona aestiva                                        | SWISSPROT_A0A0Q3WUF9 |                    |
| Chicken                            | Gallus gallus                                          | PDB_4MWN_A           | 63                 |
| Chinese bamboo partridge           | Bambusicola thoracicus                                 | SWISSPROT_B8YK69     |                    |
| Collared flycatcher                | Ficedula albicollis                                    | SWISSPROT_U3JJC5     |                    |
| Copper pheasant                    | Syrnaticus soemmerringii                               | SWISSPROT_P81711     |                    |
| Crimson horned pheasant            | Tragopan satyra                                        | SWISSPROT_Q7LZI3     |                    |
| Dalmatian pelican                  | Pelecanus crispus                                      | SWISSPROT_A0A091SL88 |                    |
| Duck (1)                           | Mus musculus                                           | PDB_5VJQ_I           | 3                  |
| Duck (2)                           | Anas platyrhynchos                                     | SWISSPROT_P00705     |                    |
| Duck (3)                           | Anas platyrhynchos                                     | SWISSPROT_P00706     |                    |
| Egyptian goose                     | Alopochen aegyptiaca                                   | SWISSPROT_P84496     |                    |
| Emu                                | Dromaius novaehollandiae                               | SWISSPROT_G3XDT7     |                    |
| Flamingo                           | Phoenicopterus ruber ruber                             | SWISSPROT_A0A091UEV3 |                    |
| Gould's finch                      | Erythrura gouldiae                                     | TREMBL_A0A3L8S3P1    |                    |
| Great crested grebe                | Podiceps cristatus                                     | SWISSPROT_A0A094LH48 |                    |
| Green junglefowl                   | Gallus varius                                          | SWISSPROT_B8YK73     |                    |
| Grey crowned crane                 | Balearica regulorum gibbericeps                        | SWISSPROT_A0A087VFU1 |                    |
| Grey francolin                     | Francolinus pondicerianus interpositus                 | SWISSPROT_B8YK71     |                    |
| Helmeted guineafowl                | Numida meleagris                                       | PDB_1HHL_A           | 2                  |
| Hoatzin                            | Opisthocomus hoazin                                    | SWISSPROT_Q91159     |                    |
| Japanese quail                     | Coturnix japonica                                      | PDB_2IHL_A           | 2                  |

|                         |                            |                      |   |
|-------------------------|----------------------------|----------------------|---|
| Kalij pheasant          | Lophura leucomelanos       | SWISSPROT_P24364     |   |
| Lady Amherst's pheasant | Chrysolophus amherstiae    | SWISSPROT_P22910     |   |
| MacQueen's bustard      | Chlamydotis macqueenii     | SWISSPROT_A0A091KHW5 |   |
| Northern fulmar         | Fulmarus glacialis         | SWISSPROT_A0A093JHL2 |   |
| Ostrich                 | Struthio camelus australis | SWISSPROT_A0A093HKR1 |   |
| Pekin duck              | Anas platyrhynchos         | PDB_5V92_A           |   |
| Plain chachalaca        | Ortalis vetula             | SWISSPROT_P00707     |   |
| Reeves's pheasant       | Syrnaticus reevesii        | SWISSPROT_P24533     |   |
| Ring-necked pheasant    | Phasianus colchicus        | PDB_1GHL_A           | 4 |
| Rock dove               | Columba livia              | TREMBL_A0A2I0LIU5    | 2 |
| Turkey                  | Meleagris gallopavo        | PDB_2LZ2_A           | 6 |
| Turkey vulture          | Cathartes aura             | SWISSPROT_A0A091LB50 |   |
| White-tailed eagle      | Haliaeetus albicilla       | SWISSPROT_A0A091PE21 |   |
| White-throated tinamou  | Tinamus guttatus           | SWISSPROT_A0A099Z0V9 |   |
| Wood duck               | Aix sponsa                 | SWISSPROT_Q7LZQ2     |   |
| Zebra finch             | Taeniopygia guttata        | SWISSPROT_B5KFT9     |   |

**Table S2. Variants produced (all were active in the OD drop assay)** The Hoatzin to HEWL mutations are shown in red, with 3 key changes in bold.

| <b>Mutations</b>       | <b>Aim</b>                                         |
|------------------------|----------------------------------------------------|
| kexB WT<br>(*1aK+*1bR) | Potential cleavage site.                           |
| <b>R50T</b>            | <b>Broader pH activity profile</b>                 |
| <b>Y61W</b>            | <b>Substrate specificity</b>                       |
| <b>V32A</b>            | Improved stability                                 |
| <b>D37N</b>            | Alkaline stability                                 |
| <b>K60R</b>            | Glycation susceptibility                           |
| <b>K60R+Y61W</b>       | K60R: glycation susceptibility; Y61W: specificity. |
| <b>K67R</b>            | Glycation susceptibility                           |
| <b>S78P</b>            | Improved stability                                 |
| <b>E88T</b>            | Alkaline stability                                 |
| <b>Y108V</b>           | <b>Substrate specificity</b>                       |
| <b>K124R</b>           | Glycation susceptibility                           |
| G19N+E21T              | Addition of N-glycosylation                        |
| H34N                   | Addition of N-glycosylation                        |
| H34W                   | Improved stability                                 |
| E41N                   | Alkaline stability                                 |
| E41R                   | Alkaline stability                                 |
| G47P                   | Improved stability                                 |
| G74A                   | Improved stability                                 |
| D89Q                   | Alkaline stability                                 |
| D90A                   | Broader pH activity profile                        |
| K92A                   | Glycation susceptibility                           |
| K96R                   | Glycation susceptibility                           |
| I97V                   | Substrate specificity                              |
| A101P                  | Improved stability                                 |
| K124S                  | Reduced glycation, improved stability              |
| K124T                  | Glycation susceptibility, improved stability       |
